# Supplementary material for: Incidence Trend of Follicular Lymphoma in Taiwan Compared to Japan and Korea, 2001–2019
Source: MDPI journal article supplement (doi:10.3390/jcm12041417), 2023-02-10
Supplement: s1 [file s1]

# Supporting Information

**Table S1. Data source**

| Database                          | Year      | Area                                                                                                                                                                                                                                                                                             |
|-----------------------------------|-----------|--------------------------------------------------------------------------------------------------------------------------------------------------------------------------------------------------------------------------------------------------------------------------------------------------|
| TCR Database                      | 2002-2007 | Taiwan. Available from:<br><a href="https://onlinelibrary.wiley.com/doi/full/10.1002/cam4.1762#cam41751-tbl-0002">https://onlinelibrary.wiley.com/doi/full/10.1002/cam4.1762#cam41751-tbl-0002</a><br>(published Oct 2018)                                                                       |
| TCR annual report                 | 2008-2019 | Taiwan. Available from:<br><a href="https://www.hpa.gov.tw/Pages/List.aspx?nodeid=269">https://www.hpa.gov.tw/Pages/List.aspx?nodeid=269</a><br>(released Feb 2022)                                                                                                                              |
| Resident Population, Taiwan       | 2008-2019 | Taiwan. Available from:<br><a href="https://www.moi.gov.tw/files/site_stuff/321/1/month/m1-06.ods">https://www.moi.gov.tw/files/site_stuff/321/1/month/m1-06.ods</a>                                                                                                                             |
| NCR                               | 2001-2008 | Japan. Available from<br><a href="https://onlinelibrary.wiley.com/action/downloadSupplement?doi=10.1111%2Fbjh.12659&amp;file=bjh12659-sup-0001-TableS1-S8.xlsx">https://onlinelibrary.wiley.com/action/downloadSupplement?doi=10.1111%2Fbjh.12659&amp;file=bjh12659-sup-0001-TableS1-S8.xlsx</a> |
| National Cancer Registry in Japan | 2014-2015 | Japan. Available from<br><a href="https://ganjoho.jp/reg_stat/statistics/data/dl/excel/cancer_incidence47pref(2014-2015).xls">https://ganjoho.jp/reg_stat/statistics/data/dl/excel/cancer_incidence47pref(2014-2015).xls</a>                                                                     |
| National Cancer Registry in Japan | 2016-2019 | Japan. Available from:<br><a href="https://ganjoho.jp/reg_stat/statistics/data/dl/excel/cancer_incidenceNCR(2016-2019).xls">https://ganjoho.jp/reg_stat/statistics/data/dl/excel/cancer_incidenceNCR(2016-2019).xls</a><br>(released Aug 2022)                                                   |
| KCCR                              | 2001-2012 | South Korea. Available from:<br><a href="https://www.ncbi.nlm.nih.gov/pmc/articles/PMC5784621/table/t1-crt-2017-093/">https://www.ncbi.nlm.nih.gov/pmc/articles/PMC5784621/table/t1-crt-2017-093/</a><br>(published online Mar 2017)                                                             |
| NHID                              | 2011-2015 | South Korea. Available from:<br><a href="https://www.ncbi.nlm.nih.gov/pmc/articles/PMC7577801/figure/f1-crt-2020-089/">https://www.ncbi.nlm.nih.gov/pmc/articles/PMC7577801/figure/f1-crt-2020-089/</a><br>(published online May 2020)                                                           |

KCCR, Korean Central Cancer Registry; NHID, National Health Information Database.

**Table S2. Case numbers of FL among Taiwan, Japan and South Korea between 2001 and 2019.**

| Year | Taiwan  |      |        | Japan   |      |        | Korea[13] | Korea[2] |
|------|---------|------|--------|---------|------|--------|-----------|----------|
|      | Overall | Male | Female | Overall | Male | Female | Overall   | Overall  |
| 2001 | --      | --   | --     | 232     | 110  | 122    | 74        | --       |
| 2002 | 118     | 68   | 50     | 287     | 149  | 138    | 89        | --       |
| 2003 | 158     | 90   | 68     | 352     | 177  | 175    | 92        | --       |
| 2004 | 144     | 80   | 64     | 425     | 218  | 207    | 77        | --       |
| 2005 | 174     | 104  | 70     | 483     | 266  | 217    | 69        | --       |
| 2006 | 183     | 102  | 81     | 504     | 230  | 274    | 102       | --       |
| 2007 | 193     | 100  | 93     | 671     | 331  | 340    | 107       | --       |
| 2008 | 169     | 91   | 78     | 790     | 389  | 401    | 124       | --       |
| 2009 | 205     | 115  | 90     | --      | --   | --     | 128       | --       |
| 2010 | 226     | 104  | 122    | --      | --   | --     | 132       | --       |
| 2011 | 238     | 123  | 115    | --      | --   | --     | 175       | 199      |
| 2012 | 249     | 136  | 113    | --      | --   | --     | 196       | 197      |
| 2013 | 239     | 130  | 109    | --      | --   | --     | --        | 267      |
| 2014 | 263     | 127  | 136    | 6875    | 3227 | 3648   | --        | 293      |
| 2015 | 290     | 145  | 145    | 7202    | 3379 | 3823   | --        | 288      |
| 2016 | 319     | 169  | 150    | 8357    | 3895 | 4462   | --        | --       |
| 2017 | 296     | 139  | 157    | 8830    | 4222 | 4608   | --        | --       |
| 2018 | 362     | 170  | 192    | 9089    | 4371 | 4717   | --        | --       |
| 2019 | 405     | 188  | 217    | 9378    | 4365 | 5013   | --        | --       |

**Table S3. Japan-to-Taiwan incidence rate ratios by gender, 2012–2019**

| Year | IRR (95% CI)      | IRR (95% CI)      | IRR (95% CI)      |
|------|-------------------|-------------------|-------------------|
|      | Overall           | Male              | Female            |
| 2002 | 1.14 (0.92, 1.41) | 1.04 (0.78, 1.38) | 1.22 (0.88, 1.69) |
| 2003 | 0.86 (0.72, 1.04) | 0.79 (0.61, 1.01) | 0.96 (0.73, 1.27) |
| 2004 | 1.10 (0.91, 1.32) | 1.05 (0.81, 1.35) | 1.16 (0.87, 1.53) |
| 2005 | 1.08 (0.91, 1.28) | 1.01 (0.81, 1.27) | 1.20 (0.91, 1.57) |
| 2006 | 1.07 (0.90, 1.27) | 0.85 (0.67, 1.07) | 1.34 (1.05, 1.72) |
| 2007 | 1.33 (1.13, 1.56) | 1.32 (1.06, 1.65) | 1.37 (1.09, 1.73) |
| 2008 | 1.83 (1.55, 2.16) | 1.72 (1.37, 2.16) | 1.94 (1.52, 2.47) |
| 2014 | 3.32 (2.93, 3.75) | 3.27 (2.74, 3.90) | 3.36 (2.83, 3.98) |
| 2015 | 4.19 (3.73, 4.71) | 3.00 (2.54, 3.54) | 3.30 (2.79, 3.89) |
| 2016 | 4.38 (3.92, 4.90) | 2.90 (2.49, 3.38) | 3.71 (3.15, 4.37) |
| 2017 | 5.06 (4.51, 5.69) | 3.80 (3.21, 4.50) | 3.76 (3.21, 4.41) |
| 2018 | 3.22 (2.90, 3.57) | 3.28 (2.82, 3.83) | 3.18 (2.75, 3.68) |
| 2019 | 2.95 (2.67, 3.26) | 2.90 (2.50, 3.35) | 3.02 (2.64, 3.46) |

IRR, incidence rate ratio; CI, confidence interval
